# Supplementary material
Source: Springer Nature journal article supplement (https://www.springermedizin.de/resource/supplementary/13075_2010_3091_MOESM1_ESM.pdf/9693748)
Supplement: MOESM1 [file 9693748]

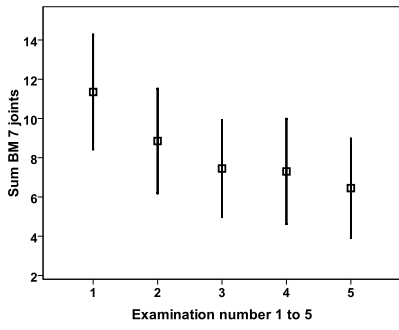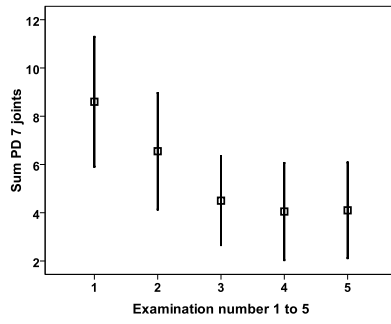

7-joint score; BM and PD

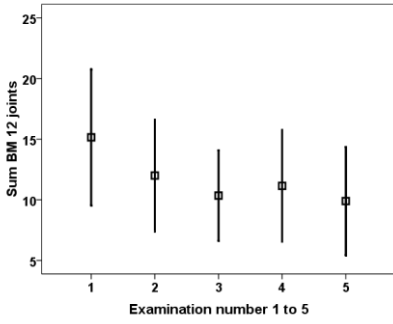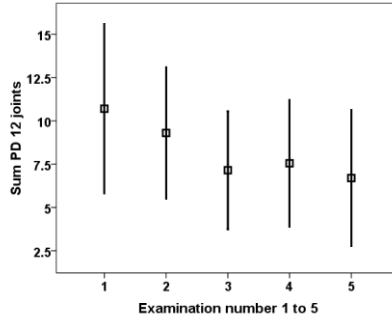

12-joint score; BM and PD

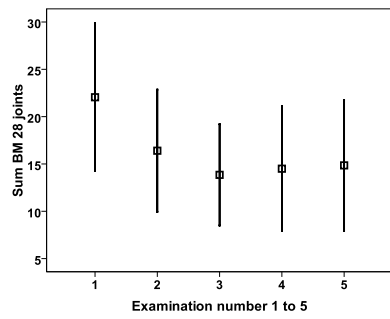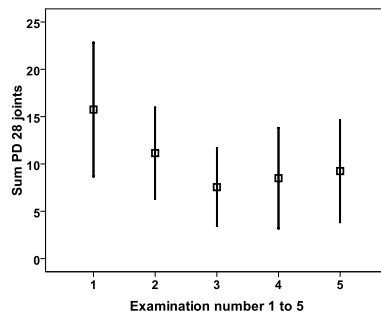

28-joint score; BM and PD

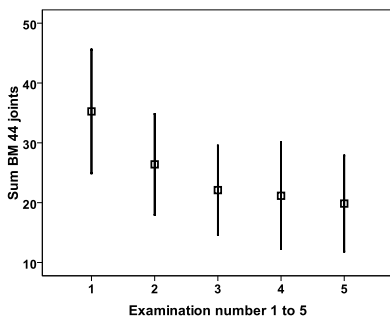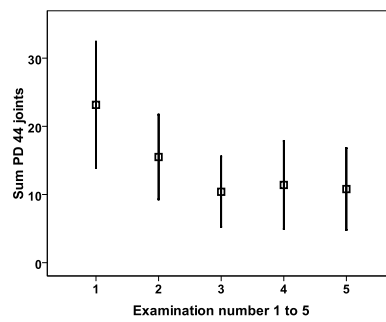

44-joint score; BM and PD

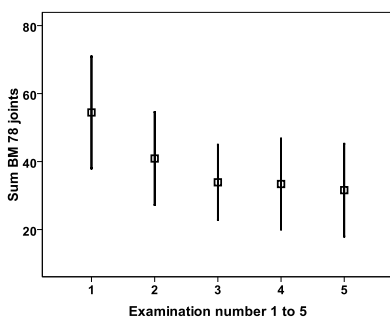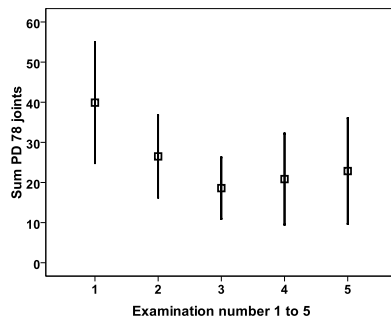

78-joint score; BM and PD
